# Supplementary material for: Investigation of the effect of reaction parameters on the microwave-assisted hydrothermal synthesis of hierarchical jasmine-flower-like ZnO nanostructures for dye-sensitized solar cells
Source: Royal Society of Chemistry journal article supplement (doi:10.1039/c6nj00457a), 2016-01-01
Supplement: c6nj00457a1.pdf [file c6nj00457a1.pdf]

## Supporting Information

# Investigation of the effect of reaction parameters on microwave-assisted hydrothermal synthesis of hierarchical jasmine-flower- like ZnO nanostructures for dye-sensitized solar cells

*Ramachandran Krishnapriya, Selvarasu Praneetha and Arumugam Vadivel Murugan\**

*Advanced Functional Nanostructured Materials Laboratory, Centre for Nanoscience and Technology,  
Madanjeet School of Green Energy Technologies, Pondicherry University (A Central University),  
Pondicherry-605014, India. Tel. +91-413-2654 975, E-mail: [avmrajeshwar@gmail.com](mailto:avmrajeshwar@gmail.com);  
[avmurugan.nst@pondiuni.edu.in](mailto:avmurugan.nst@pondiuni.edu.in)*

---

**Note:** This supplementary information contains supplementary Table S1 to S9 of solar cell parameters calculated for five DSSCs devices fabricated using the identical conditions.

Table S1 to S3 Temperature-dependent (RT – Room temperature, T-50 - at 50°C, T-125 - at 125°C),

Table S4 to S6 Power-dependent (P-50 - at power 50W, P-200 -at 200W, P-300 - at 300W), Time-dependent (T-2-2 - at 2 min ramp and 2 min hold, T-10-2 - at 10 min ramp and 2 min hold, T-10-10 - at 10 min ramp and 10 min hold) MW-HT conditions.

**Table S1**

| RT               |          |          |           |           |       |       |
|------------------|----------|----------|-----------|-----------|-------|-------|
| Cell             | $J_{sc}$ | $V_{oc}$ | $J_{max}$ | $V_{max}$ | $FF$  | PCE   |
| 1                | 0.410    | 0.547    | 0.343     | 0.432     | 0.661 | 0.148 |
| 2                | 0.420    | 0.546    | 0.341     | 0.435     | 0.647 | 0.148 |
| 3                | 0.410    | 0.550    | 0.343     | 0.433     | 0.659 | 0.149 |
| 4                | 0.430    | 0.551    | 0.343     | 0.439     | 0.636 | 0.151 |
| 5                | 0.410    | 0.546    | 0.345     | 0.422     | 0.650 | 0.146 |
| <b>Average</b>   | 0.416    | 0.548    | 0.343     | 0.432     | 0.650 | 0.148 |
| <b>Deviation</b> | 0.007    | 0.002    | 0.001     | 0.004     | 0.007 | 0.001 |

**Table S2**

| <b>T-50</b>      |                       |                       |                        |                        |           |            |
|------------------|-----------------------|-----------------------|------------------------|------------------------|-----------|------------|
| <b>Cell</b>      | <b>J<sub>sc</sub></b> | <b>V<sub>oc</sub></b> | <b>J<sub>max</sub></b> | <b>V<sub>max</sub></b> | <b>FF</b> | <b>PCE</b> |
| <b>1</b>         | 0.570                 | 0.585                 | 0.543                  | 0.470                  | 0.765     | 0.255      |
| <b>2</b>         | 0.580                 | 0.589                 | 0.516                  | 0.478                  | 0.722     | 0.247      |
| <b>3</b>         | 0.570                 | 0.590                 | 0.530                  | 0.460                  | 0.725     | 0.244      |
| <b>4</b>         | 0.570                 | 0.582                 | 0.520                  | 0.480                  | 0.752     | 0.250      |
| <b>5</b>         | 0.560                 | 0.573                 | 0.530                  | 0.460                  | 0.760     | 0.244      |
| <b>Average</b>   | 0.570                 | 0.584                 | 0.528                  | 0.470                  | 0.745     | 0.248      |
| <b>Deviation</b> | 0.004                 | 0.003                 | 0.008                  | 0.008                  | 0.017     | 0.004      |

**Table S3**

| <b>T-125</b>     |                       |                       |                        |                        |           |            |
|------------------|-----------------------|-----------------------|------------------------|------------------------|-----------|------------|
| <b>Cell</b>      | <b>J<sub>sc</sub></b> | <b>V<sub>oc</sub></b> | <b>J<sub>max</sub></b> | <b>V<sub>max</sub></b> | <b>FF</b> | <b>PCE</b> |
| <b>1</b>         | 5.150                 | 0.589                 | 4.586                  | 0.425                  | 0.642     | 1.947      |
| <b>2</b>         | 5.200                 | 0.589                 | 4.430                  | 0.440                  | 0.636     | 1.949      |
| <b>3</b>         | 5.140                 | 0.572                 | 4.520                  | 0.430                  | 0.661     | 1.944      |
| <b>4</b>         | 5.100                 | 0.588                 | 4.530                  | 0.430                  | 0.650     | 1.948      |
| <b>5</b>         | 5.200                 | 0.589                 | 4.450                  | 0.440                  | 0.639     | 1.958      |
| <b>Average</b>   | 5.158                 | 0.585                 | 4.503                  | 0.433                  | 0.646     | 1.949      |
| <b>Deviation</b> | 0.034                 | 0.006                 | 0.051                  | 0.006                  | 0.008     | 0.003      |

**Table S4**

| <b>P-50</b>      |                       |                       |                        |                        |           |            |
|------------------|-----------------------|-----------------------|------------------------|------------------------|-----------|------------|
| <b>Cell</b>      | <b>J<sub>sc</sub></b> | <b>V<sub>oc</sub></b> | <b>J<sub>max</sub></b> | <b>V<sub>max</sub></b> | <b>FF</b> | <b>PCE</b> |
| <b>1</b>         | 1.480                 | 0.539                 | 1.245                  | 0.390                  | 0.609     | 0.486      |
| <b>2</b>         | 1.480                 | 0.540                 | 1.230                  | 0.392                  | 0.603     | 0.482      |
| <b>3</b>         | 1.470                 | 0.539                 | 1.240                  | 0.390                  | 0.610     | 0.484      |
| <b>4</b>         | 1.480                 | 0.538                 | 1.250                  | 0.389                  | 0.611     | 0.486      |
| <b>5</b>         | 1.491                 | 0.539                 | 1.246                  | 0.393                  | 0.609     | 0.490      |
| <b>Average</b>   | 1.480                 | 0.539                 | 1.242                  | 0.391                  | 0.608     | 0.485      |
| <b>Deviation</b> | 0.004                 | 0.000                 | 0.006                  | 0.001                  | 0.002     | 0.002      |

**Table S5**

| <b>P-200</b>     |                       |                       |                        |                        |           |            |
|------------------|-----------------------|-----------------------|------------------------|------------------------|-----------|------------|
| <b>Cell</b>      | <b>J<sub>sc</sub></b> | <b>V<sub>oc</sub></b> | <b>J<sub>max</sub></b> | <b>V<sub>max</sub></b> | <b>FF</b> | <b>PCE</b> |
| <b>1</b>         | 2.410                 | 0.498                 | 2.181                  | 0.385                  | 0.700     | 0.840      |
| <b>2</b>         | 2.410                 | 0.510                 | 2.180                  | 0.387                  | 0.686     | 0.844      |
| <b>3</b>         | 2.400                 | 0.499                 | 2.178                  | 0.385                  | 0.700     | 0.839      |
| <b>4</b>         | 2.410                 | 0.498                 | 2.181                  | 0.385                  | 0.700     | 0.840      |
| <b>5</b>         | 2.500                 | 0.500                 | 2.200                  | 0.390                  | 0.686     | 0.858      |
| <b>Average</b>   | 2.426                 | 0.501                 | 2.184                  | 0.386                  | 0.694     | 0.844      |
| <b>Deviation</b> | 0.030                 | 0.004                 | 0.006                  | 0.002                  | 0.007     | 0.006      |

**Table S6**

| <b>P-300</b>     |                       |                       |                        |                        |           |            |
|------------------|-----------------------|-----------------------|------------------------|------------------------|-----------|------------|
| <b>Cell</b>      | <b>J<sub>sc</sub></b> | <b>V<sub>oc</sub></b> | <b>J<sub>max</sub></b> | <b>V<sub>max</sub></b> | <b>FF</b> | <b>PCE</b> |
| <b>1</b>         | 6.770                 | 0.585                 | 5.814                  | 0.422                  | 0.620     | 2.454      |
| <b>2</b>         | 6.800                 | 0.590                 | 5.820                  | 0.423                  | 0.614     | 2.462      |
| <b>3</b>         | 6.720                 | 0.588                 | 5.800                  | 0.424                  | 0.622     | 2.459      |
| <b>4</b>         | 6.900                 | 0.585                 | 5.790                  | 0.426                  | 0.611     | 2.467      |
| <b>5</b>         | 6.700                 | 0.585                 | 5.814                  | 0.422                  | 0.626     | 2.454      |
| <b>Average</b>   | 6.778                 | 0.587                 | 5.808                  | 0.423                  | 0.619     | 2.459      |
| <b>Deviation</b> | 0.058                 | 0.002                 | 0.010                  | 0.001                  | 0.005     | 0.004      |

**Table S7**

| <b>T-2-2</b>     |                       |                       |                        |                        |           |            |
|------------------|-----------------------|-----------------------|------------------------|------------------------|-----------|------------|
| <b>Cell</b>      | <b>J<sub>sc</sub></b> | <b>V<sub>oc</sub></b> | <b>J<sub>max</sub></b> | <b>V<sub>max</sub></b> | <b>FF</b> | <b>PCE</b> |
| <b>1</b>         | 1.790                 | 0.510                 | 1.666                  | 0.405                  | 0.740     | 0.676      |
| <b>2</b>         | 1.800                 | 0.500                 | 1.650                  | 0.400                  | 0.733     | 0.660      |
| <b>3</b>         | 1.780                 | 0.512                 | 1.700                  | 0.390                  | 0.727     | 0.663      |
| <b>4</b>         | 1.790                 | 0.510                 | 1.666                  | 0.405                  | 0.740     | 0.676      |
| <b>5</b>         | 1.820                 | 0.511                 | 1.688                  | 0.403                  | 0.731     | 0.680      |
| <b>Average</b>   | 1.796                 | 0.509                 | 1.674                  | 0.401                  | 0.734     | 0.671      |
| <b>Deviation</b> | 0.011                 | 0.003                 | 0.016                  | 0.005                  | 0.004     | 0.007      |

**Table S8**

| <b>T-10-2</b>    |                       |                       |                        |                        |           |            |
|------------------|-----------------------|-----------------------|------------------------|------------------------|-----------|------------|
| <b>Cell</b>      | <b>J<sub>sc</sub></b> | <b>V<sub>oc</sub></b> | <b>J<sub>max</sub></b> | <b>V<sub>max</sub></b> | <b>FF</b> | <b>PCE</b> |
| <b>1</b>         | 3.870                 | 0.500                 | 3.318                  | 0.350                  | 0.600     | 1.161      |
| <b>2</b>         | 3.880                 | 0.510                 | 3.320                  | 0.358                  | 0.601     | 1.189      |
| <b>3</b>         | 3.900                 | 0.520                 | 3.350                  | 0.355                  | 0.586     | 1.189      |
| <b>4</b>         | 3.870                 | 0.500                 | 3.318                  | 0.350                  | 0.600     | 1.161      |
| <b>5</b>         | 3.890                 | 0.500                 | 3.320                  | 0.353                  | 0.603     | 1.172      |
| <b>Average</b>   | 3.882                 | 0.506                 | 3.325                  | 0.353                  | 0.598     | 1.174      |
| <b>Deviation</b> | 0.010                 | 0.007                 | 0.010                  | 0.003                  | 0.005     | 0.009      |

**Table S9**

| <b>T-10-10</b>   |                       |                       |                        |                        |           |            |
|------------------|-----------------------|-----------------------|------------------------|------------------------|-----------|------------|
| <b>Cell</b>      | <b>J<sub>sc</sub></b> | <b>V<sub>oc</sub></b> | <b>J<sub>max</sub></b> | <b>V<sub>max</sub></b> | <b>FF</b> | <b>PCE</b> |
| <b>1</b>         | 7.280                 | 0.529                 | 6.462                  | 0.394                  | 0.661     | 2.546      |
| <b>2</b>         | 7.310                 | 0.530                 | 6.465                  | 0.402                  | 0.671     | 2.599      |
| <b>3</b>         | 7.260                 | 0.530                 | 6.450                  | 0.396                  | 0.664     | 2.554      |
| <b>4</b>         | 7.280                 | 0.530                 | 6.470                  | 0.396                  | 0.664     | 2.562      |
| <b>5</b>         | 7.320                 | 0.528                 | 6.460                  | 0.392                  | 0.655     | 2.532      |
| <b>Average</b>   | 7.29                  | 0.5294                | 6.4614                 | 0.396                  | 0.663     | 2.559      |
| <b>Deviation</b> | 0.020                 | 0.007                 | 0.005                  | 0.002                  | 0.004     | 0.018      |
